# Chronic Medical Conditions and Risk of Sepsis

Henry E. Wang<sup>1\*</sup>, Nathan I. Shapiro<sup>2</sup>, Russell Griffin<sup>3</sup>, Monika M. Safford<sup>4</sup>, Suzanne Judd<sup>5</sup>, George Howard<sup>5</sup>

**1** Department of Emergency Medicine, University of Alabama School of Medicine, Birmingham, Alabama, United States of America, **2** Department of Emergency Medicine, Beth Israel Deaconess Medical Center, Boston, Massachusetts, United States of America, **3** Department of Epidemiology, School of Public Health, University of Alabama at Birmingham, Birmingham, Alabama, United States of America, **4** Division of Preventive Medicine, Department of Medicine, University of Alabama School of Medicine, Birmingham, Alabama, United States of America, **5** Department of Biostatistics, School of Public Health, University of Alabama at Birmingham, Birmingham, Alabama, United States of America

## Abstract

**Background:** We sought to determine the associations between baseline chronic medical conditions and future risk of sepsis.

**Methods:** Longitudinal cohort study using the 30,239 community-dwelling participants of the REGARDS cohort. We determined associations between baseline chronic medical conditions and incident sepsis episodes, defined as hospitalization for an infection with the presence of infection plus two or more systemic inflammatory response syndrome criteria.

**Results:** Over the mean observation time of 4.6 years (February 5, 2003 through October 14, 2011), there were 975 incident cases of sepsis. Incident sepsis episodes were associated with older age ( $p < 0.001$ ), white race (HR 1.39; 95% CI: 1.22–1.59), lower education ( $p < 0.001$ ) and income ( $p < 0.001$ ), tobacco use ( $p < 0.001$ ), and alcohol use ( $p = 0.02$ ). Incident sepsis episodes were associated with baseline chronic lung disease (adjusted HR 2.43; 95% CI: 2.05–2.86), peripheral artery disease (2.16; 1.58–2.95), chronic kidney disease (1.99; 1.73–2.29), myocardial infarction 1.79 (1.49–2.15), diabetes 1.78 (1.53–2.07), stroke 1.67 (1.34–2.07), deep vein thrombosis 1.63 (1.29–2.06), coronary artery disease 1.61 (1.38–1.87), hypertension 1.49 (1.29–1.74), atrial fibrillation 1.48 (1.21–1.81) and dyslipidemia 1.16 (1.01–1.34). Sepsis risk increased with the number of chronic medical conditions ( $p < 0.001$ ).

**Conclusions:** Individuals with chronic medical conditions are at increased risk of future sepsis events.

**Citation:** Wang HE, Shapiro NI, Griffin R, Safford MM, Judd S, et al. (2012) Chronic Medical Conditions and Risk of Sepsis. PLoS ONE 7(10): e48307. doi:10.1371/journal.pone.0048307

**Editor:** Jeffrey A. Gold, Oregon Health and Science University, United States of America

**Received:** July 11, 2012; **Accepted:** September 24, 2012; **Published:** October 31, 2012

**Copyright:** © 2012 Wang et al. This is an open-access article distributed under the terms of the Creative Commons Attribution License, which permits unrestricted use, distribution, and reproduction in any medium, provided the original author and source are credited.

**Funding:** This study was supported by R01-NR012726 from the National Institute for Nursing Research, UL1-RR025777 from the National Center for Research Resources, as well as by grants from the Center for Clinical and Translational Science and the Lister Hill Center for Health Policy of the University of Alabama at Birmingham. The parent study was supported by cooperative agreement U01 NS041588 from the National Institute of Neurological Disorders and Stroke, National Institutes of Health, Department of Health and Human Services. The content is solely the responsibility of the authors and does not necessarily represent the official views of the National Institute of Neurological Disorders and Stroke or the National Institutes of Health. Representatives from these organizations did not have any role in the design and conduct of the study, the collection, management, analysis, and interpretation of the data, or the preparation or approval of the manuscript.

**Competing Interests:** The authors have declared that no competing interests exist.

\* E-mail: hwang@uabmc.edu

## Introduction

Sepsis is the syndrome of microbial infection complicated by systemic inflammatory response, a process that may eventually lead to organ injury, shock and death. [1] Sepsis poses a significant burden upon the US healthcare system, resulting in an estimated 750,000 hospital admissions, 570,000 Emergency Department visits, 200,000 deaths and \$16.7 billion in medical expenditures annually. [2,3,4] A prior study highlights the presence of regional variations in US sepsis mortality. [5].

Over the last century, the most significant public health gains in the United States have resulted from evidence-based risk stratification, detection and reduction efforts for common medical conditions such as cardiovascular disease and stroke. [6,7,8] Despite the national importance of the condition, progress at reducing the public health impact of sepsis has been relatively

limited. A potential explanation is that current scientific and clinical initiatives tend to focus upon the acute care of sepsis after the onset of disease. Despite the presence of plausible pathophysiologic pathways as well as prevention and risk reduction strategies, few efforts have conceptualized sepsis as a predictable or preventable condition. [9,10].

The first step in devising disease risk stratification or prevention strategies is to identify the characteristics of individuals at increased risk of developing the illness. A suitable design for characterizing the risk factors associated with sepsis is a population-based cohort with baseline information on each individual coupled with prospective longitudinal surveillance for incident sepsis events. [11] The Reasons for Geographic And Racial Differences in Stroke (REGARDS) study is one of the nation's largest ongoing longitudinal cohort studies, encompassing 30,239 community-dwelling participants across the US. [12] The

objective of this study was to describe the associations between baseline chronic medical conditions and future risk of sepsis in the REGARDS cohort.

## Methods

### Ethics Statement

This study was approved by the Institutional Review Board of the University of Alabama at Birmingham.

### Study Design

The study utilized a population-based longitudinal cohort design using the national REGARDS cohort.

### The REGARDS Cohort

The REGARDS study is one of the largest ongoing national cohorts of community-dwelling individuals in the US. [12] Designed to evaluate geographic and black-white stroke mortality variations, REGARDS includes 30,239 individuals  $\geq 45$  years old from across the United States. REGARDS encompasses representation from all regions of the continental US. Participant representation emphasizes the Southeastern US, with 20% of the cohort originating from the coastal plains of North Carolina, South Carolina and Georgia, and 30% originating from the remainder of North Carolina, South Carolina and Georgia plus Tennessee, Mississippi, Alabama, Louisiana and Arkansas. The cohort includes 41% African Americans, 45% men, and 69% individuals over 60 years old. The cohort does not include Hispanics.

REGARDS obtained baseline information on each participant from structured interviews and in-home visits. Baseline data for each participant include physical characteristics (height, weight), physiology (blood pressure, pulse, electrocardiogram), diet, family history, psychosocial factors and prior residences. The study also obtained biological specimens (blood, urine, etc.). On a semi-annual basis, the study contacts each participant to determine the date, location and attributed reason for all hospitalizations during the prior 6 months. If the participant has died, the study team interviewed proxies to ascertain the circumstances of the participant's death. Follow-up on participants in this manner has occurred since 2003.

### Identification of Sepsis Events

We sought and reviewed all hospitalizations attributed by participants to a serious infection. Definitions for serious infections were based upon infection taxonomies developed by Angus, et al. [2] Two trained abstractors independently reviewed all relevant medical records to confirm 1) the presence of a serious infection on initial hospital presentation, and 2) the relevance of the serious infection as a major reason for hospitalization. The abstractors then identified clinical and laboratory information from the first 28-hours of hospitalization as well as outcomes for the hospitalization. The presence of a serious infection was based upon review of physician Emergency Department, hospital admission and hospital discharge records. We did not use laboratory, microbiological or radiographic information to define serious infections because these test results often have unclear connections with the overall clinical impression or course.

We used the international consensus definition of sepsis, consisting of presentation to the hospital with an infection plus two or more systemic inflammatory response syndrome (SIRS) criteria. [1] SIRS criteria included 1) heart rate  $>90$  beats/minute, 2) fever (temperature  $>38.3^{\circ}\text{C}$  or  $<36^{\circ}\text{C}$ ), 3) tachypnea ( $>20$  breaths/min) or  $\text{PCO}_2 < 32$  mmHg, and 4) leukocytosis

(WBC  $>12,000$  or  $<4,000$  cells/ $\text{mm}^3$  or  $>10\%$  bands). We defined presentation to the hospital as the time of Emergency Department triage or admission to inpatient unit (for participants admitted directly to the hospital). To account for acute changes in the participant's condition during early hospitalization, we used vital signs and laboratory test results for the initial 28-hours of hospitalization. The medical record review process did not include vital signs or laboratory findings at later time points, nor sepsis developing at later time period as a result of other major illness. For purposes of this analysis, we did not include organ dysfunction in the definition of sepsis.

All simple data discordances were resolved by consensus of abstractors with additional physician-level adjudication for more complex discordances. Initial review of 1,349 hospital records indicated excellent inter-rater agreement for the presence of a serious infection ( $\text{kappa} = 0.92$ ) and the presence of sepsis ( $\text{kappa} = 0.90$ ) upon hospital presentation.

### Definition of Covariates

Demographic characteristics evaluated in this analysis included age, sex, race, geographic region, income and education. Behavioral characteristics included tobacco and alcohol use. Tobacco use was defined as current, past and never. We defined alcohol use according to the National Institute on Alcohol Abuse and Alcoholism classification; i.e., moderate (1 drink per day for women or 2 drinks per day for men) and heavy alcohol use ( $>1$  drink per day for women and  $>2$  drinks per day for men). [13].

The parent REGARDS study was designed to oversample African-Americans and residents of the geographic regions referred to as the "Stroke Buckle" (coastal regions of North Carolina, South Carolina, and Georgia) and "Stroke Belt" (remainder of North Carolina, South Carolina, and Georgia; Alabama, Mississippi, Tennessee, Arkansas and Louisiana). We used the same geographic regions corresponding to "Stroke Buckle", "Stroke Belt", and "Non-Belt/Buckle."

Evaluated chronic medical conditions included hypertension, diabetes, dyslipidemia, heart disease, atrial fibrillation, myocardial infarction, stroke, deep vein thrombosis, peripheral artery disease, chronic kidney disease and chronic lung disease. We defined hypertension as systolic blood pressure  $\geq 140$  mm Hg, diastolic blood pressure  $\geq 90$  mm Hg, or the use of antihypertensive agents. Diabetes included individuals with a fasting glucose  $\geq 126$  mg/dL, a non-fasting glucose  $\geq 200$  mg/dL, or the use of insulin or oral hypoglycemic agents. Dyslipidemia included individuals with self-reported high cholesterol or the use of lipid lowering medications.

Heart disease consisted of individuals with a self-reported history of myocardial infarction, coronary artery bypass grafting, or cardiac angioplasty or stenting, or baseline electrocardiographic evidence of myocardial infarction. We identified atrial fibrillation based upon participant self-report or baseline electrocardiographic evidence. Participants self-reported the prior history of stroke (including transient ischemic attacks), or deep vein thrombosis. Peripheral artery disease included a self-reported history of lower extremity arterial bypass or leg amputation.

Chronic kidney disease included those with an estimated glomerular filtration rate  $<60$  ml/min/1.73 m<sup>2</sup>, calculated using baseline serum creatinine and the CKD-EPI equation. [14] REGARDS did not identify chronic lung diseases such as chronic obstructive pulmonary disease, emphysema, or asthma. Therefore we used self-reported pulmonary medications as a surrogate marker for chronic lung disease. Pulmonary medications included beta agonists, leukotriene inhibitors, inhaled corticosteroids, combination inhalers, and other pulmonary medications such as ipratropium, cromolyn, aminophylline and theophylline.

## Data Analysis

We compared demographic and clinical characteristics between sepsis and non-sepsis groups using the log-rank test for equality across strata. We used Cox proportional hazards regression to calculate hazard ratios and 95% confidence intervals for the association between each demographic and clinical factor and incident sepsis. For the Cox regression models, we defined person-time at risk as the time (days) from in-person examination to the first incidence of sepsis or the last follow-up interview, whichever came first. For the associations with each chronic medical condition, we adjusted the models for age, sex, race, education, geographic region, income, and smoking status. To assess the effect of comorbid burden upon sepsis risk, we created a Cox model evaluating the association between the number of chronic medical conditions and incident sepsis, adjusting for age, sex, geographic region, income, education and tobacco use. We confirmed the proportional hazards relationship for all regression models.

## Sensitivity Analysis

Due to the time lag in observations and medical record retrieval, we could not review medical records for 1,157 participants with a reported hospitalization for serious infection. Furthermore, these unexamined hospitalizations occurred across the observation period (2003–2011) and were not limited to select time periods. Therefore, in a sensitivity analysis we repeated the analysis excluding participants with reported hospitalizations for serious infection that had not yet been adjudicated.

## Results

Among the 30,239 REGARDS participants, from February 5, 2003 through October 14, 2011 we identified 2,157 hospitalizations for serious infection, encompassing 1,297 sepsis and 975 incident sepsis events. The most common infection types associated with incident sepsis cases were pneumonia, kidney and urinary tract infections, and abdominal infections. (Table 1) Pneumonia and other lung infections comprised over half of incident sepsis cases.

The risk of incident sepsis was higher among older individuals. (Table 2) Whites were at higher risk of incident sepsis than blacks. Sepsis risk was also increased among those in the lowest education and income categories. While both current and past tobacco use

were associated with increased incident sepsis risk, the risk was decreased with heavy or moderate alcohol use.

All of the chronic medical conditions included in the analysis exhibited significant adjusted associations with incident sepsis. Chronic lung disease and chronic kidney disease exhibited the strongest adjusted associations with incident sepsis. (Table 3) The risk of incident sepsis was associated with the number of chronic medical conditions ( $p$ -trend  $<0.001$ ). (Figure 1).

In a sensitivity analysis, we repeated the analysis excluding 1,157 participants with reported serious infection hospitalizations that had not yet been reviewed or adjudicated, a figure expected to yield an additional 300 incident sepsis events; the associations were largely similar. Compared with incident sepsis individuals included in the analysis, the excluded individuals were older, more likely to be male, and had a higher number of chronic medical conditions. There were no racial differences between individuals included and excluded from the analysis.

## Discussion

This study confirms the association of baseline chronic medical conditions with the risk of future sepsis events. While prior studies have linked medical comorbidities with severity of sepsis or degree of organ dysfunction, there have been no efforts connecting these conditions at stable baseline with risk of future sepsis events. [11,15,16,17,18] The findings of this study may prove useful in sepsis care, pointing to risk detection, stratification and reduction as potential sepsis management strategies. Risk prevention and reduction strategies have proven effective for common medical conditions such as cardiovascular disease and stroke. [6].

We emphasize that this study identifies associations between baseline chronic medical conditions and sepsis but does not indicate a causal relationship. However, there are possible pathophysiologic connections between chronic medical conditions and the future risk of sepsis. Numerous common conditions have been associated with chronic inflammation, including obesity, diabetes, heart disease and smoking, among others. [19,20,21,22,23,24] Inflammation plays a central role in sepsis pathophysiology, and chronic inflammation could raise the risk of progression to sepsis when subjected to a bacterial pathogen. [25] Chronic inflammation may also indicate individuals prone to developing a dysfunctional or exaggerated response to microbial infection. Associations between vascular disease and sepsis have

**Table 1.** Infection types associated with hospitalizations for sepsis.

| Infection Type                                  | Percentage of Incident Sepsis Hospitalizations (n = 975); n (%) |
|-------------------------------------------------|-----------------------------------------------------------------|
| Pneumonia                                       | 427 (43.4)                                                      |
| Kidney and Urinary Tract Infections             | 155 (15.9)                                                      |
| Abdominal                                       | 133 (13.6)                                                      |
| Bronchitis, Influenza and other Lung Infections | 84 (8.6)                                                        |
| Skin and Soft Tissue                            | 71 (7.3)                                                        |
| Sepsis                                          | 63 (6.5)                                                        |
| Fever of Unknown Origin                         | 14 (1.4)                                                        |
| Unknown/Other                                   | 14 (1.4)                                                        |
| Surgical Wound                                  | 6 (0.6)                                                         |
| Catheter (IV/Central/Dialysis)                  | 5 (0.5)                                                         |
| Meningitis                                      | 3 (0.3)                                                         |

doi:10.1371/journal.pone.0048307.t001

**Table 2.** Demographic and health behavioral characteristics between subjects who developed sepsis and those that did not.

|                          | Sepsis (N = 975) | No Sepsis (N = 29,208) | Hazard Ratio (95% CI) | p-value* |
|--------------------------|------------------|------------------------|-----------------------|----------|
| <b>DEMOGRAPHICS</b>      |                  |                        |                       |          |
| Age (%)                  |                  |                        |                       |          |
| 45–54                    | 4.9              | 11.9                   | Ref                   | <0.001   |
| 55–64                    | 26.9             | 37.9                   | 1.44 (1.04–2.00)      |          |
| 65–74                    | 36.2             | 31.9                   | 2.29 (1.66–3.16)      |          |
| 75+                      | 32.0             | 18.2                   | 3.87 (2.80–5.35)      |          |
| Gender (%)               |                  |                        |                       |          |
| Male                     | 52.5             | 44.6                   | 1.30 (1.15–1.48)      | 0.12     |
| Female                   | 47.5             | 55.4                   | Ref                   |          |
| Race (%)                 |                  |                        |                       |          |
| White                    | 68.0             | 58.2                   | 1.39 (1.22–1.59)      | <0.001   |
| Black                    | 32.0             | 41.8                   | Ref                   |          |
| Education (%)            |                  |                        |                       |          |
| Less than high school    | 16.0             | 12.5                   | 1.88 (1.54–2.29)      | <0.001   |
| High school graduate     | 28.7             | 25.8                   | 1.52 (1.28–1.80)      |          |
| Some college             | 28.1             | 26.8                   | 1.41 (1.19–1.67)      |          |
| College or higher        | 27.3             | 35.0                   | Ref                   |          |
| Income (%)               |                  |                        |                       |          |
| <\$20k                   | 24.7             | 17.9                   | 1.78 (1.49–2.13)      | <0.001   |
| \$20k–\$34k              | 28.2             | 24.1                   | 1.41 (1.19–1.67)      |          |
| \$35k–\$74k              | 25.9             | 29.7                   | Ref                   |          |
| ≥\$75k                   | 10.6             | 15.9                   | 0.77 (0.61–0.96)      |          |
| Refused                  | 10.6             | 12.4                   | 1.07 (0.85–1.35)      |          |
| Geographic Region        |                  |                        |                       |          |
| Stroke “Buckle”          | 21.6             | 20.9                   | 1.23 (1.04–1.45)      | 0.04     |
| Stroke “Belt”            | 37.8             | 34.5                   | 1.22 (1.06–1.41)      |          |
| Non-["Belt" or "Buckle"] | 40.7             | 44.6                   | Ref                   |          |
| <b>HEALTH BEHAVIORS</b>  |                  |                        |                       |          |
| Tobacco Use (%)          |                  |                        |                       |          |
| Current                  | 17.8             | 14.5                   | 1.85 (1.54–2.22)      | <0.001   |
| Past                     | 48.7             | 39.9                   | 1.64 (1.42–1.88)      |          |
| Never                    | 33.5             | 45.6                   | Ref                   |          |
| Alcohol Use (%)          |                  |                        |                       |          |
| Heavy                    | 4.0              | 4.0                    | 0.89 (0.64–1.23)      | 0.02     |
| Moderate                 | 29.2             | 33.5                   | 0.78 (0.67–0.89)      |          |
| None                     | 66.8             | 62.5                   | Ref                   |          |

Total of 975 incident sepsis events among 30,239 participants in the REGARDS cohort.

\*Estimated from a log-rank test.

doi:10.1371/journal.pone.0048307.t002

not been previously described but are plausible given the role of endothelial dysfunction in sepsis pathophysiology. [26].

The notion of sepsis prevention is also plausible given the mutable nature of many of the risk factors identified in this study. For example, hypertension and dyslipidemia control are possible through pharmacotherapy and have resulted in large reductions in cardiovascular and cerebrovascular disease. [6] Glycemic control may limit sequelae of diabetes as well as the risk of pneumonia hospitalization. [27,28] Smoking cessation is an important strategy for reducing cardiovascular risk and could yield similar benefits for sepsis risk reduction. [29] Outside of these conditions, aggressive vaccination strategies may provide another approach for curtailing

disease. While seeming to overlap with risk factors already identified for other diseases, the identification of new relationships with sepsis is important because health behavior changes may be motivated differently by different medical conditions. Most importantly, our study confirms that an individual's risk of sepsis is associated with the number of chronic medical conditions present. Therefore, if causal relationships were confirmed, mitigation of a combination of risk factors might reduce lifetime sepsis risk.

Our study offers additional perspectives of sepsis epidemiology and its risk factors. For example, half of the sepsis in this series involved infection types other than pneumonia. [30] Diabetes and

**Table 3.** Chronic medical conditions and associations with incident sepsis.

| Chronic Medical Condition | Risk of Sepsis (per 1,000) |                               | Unadjusted HR of Sepsis (95% CI) | Adjusted HR of Sepsis (95% CI) <sup>†</sup> |
|---------------------------|----------------------------|-------------------------------|----------------------------------|---------------------------------------------|
|                           | Among those with condition | Among those without condition |                                  |                                             |
| Chronic Lung Disease*     | 72.7                       | 28.2                          | 2.72 (2.33–3.17)                 | 2.43 (2.05–2.86)                            |
| Peripheral Artery Disease | 68.5                       | 31.4                          | 2.64 (1.96–3.55)                 | 2.16 (1.58–2.95)                            |
| Chronic Kidney Disease    | 53.4                       | 25.4                          | 2.32 (2.04–2.64)                 | 1.99 (1.73–2.29)                            |
| Myocardial Infarction     | 60.2                       | 29.5                          | 2.22 (1.87–2.64)                 | 1.79 (1.49–2.15)                            |
| Diabetes                  | 47.7                       | 28.0                          | 1.84 (1.61–2.11)                 | 1.78 (1.53–2.07)                            |
| Stroke                    | 56.5                       | 30.5                          | 2.08 (1.70–2.54)                 | 1.67 (1.34–2.07)                            |
| Deep Vein Thrombosis      | 56.9                       | 30.6                          | 1.96 (1.58–2.43)                 | 1.63 (1.29–2.06)                            |
| Coronary Artery Disease   | 52.7                       | 27.7                          | 2.05 (1.78–2.36)                 | 1.61 (1.38–1.87)                            |
| Hypertension              | 37.6                       | 24.3                          | 1.61 (1.40–1.84)                 | 1.49 (1.29–1.74)                            |
| Atrial Fibrillation       | 49.4                       | 30.8                          | 1.78 (1.47–2.14)                 | 1.48 (1.21–1.81)                            |
| Dyslipidemia              | 38.2                       | 29.3                          | 1.30 (1.15–1.48)                 | 1.16 (1.01–1.34)                            |

Total of 975 incident sepsis events among 30,239 participants in the REGARDS cohort. Estimated from Cox proportional hazards regression and adjusted for gender, age, race, education, income, and smoking status.

<sup>†</sup>Adjusted for age, sex, race, education, income, geographic region, alcohol use, and smoking status.

\*Chronic lung disease was defined as individuals reporting use of pulmonary medications.

doi:10.1371/journal.pone.0048307.t003

chronic kidney disease have been associated with increased sepsis mortality; our study suggests that increased sepsis attack rates may partially explain the increased sepsis mortality in these subgroups. [31,32] While recent studies highlight the increased risk of acute atrial fibrillation and stroke following a sepsis event, our study indicates that baseline atrial fibrillation and stroke are also precursors for sepsis. [33,34] In contrast to studies suggesting a protective role from dyslipidemia, our study indicates that baseline

dyslipidemia is clearly associated with an increased risk of sepsis. [35].

We also observed some unexpected findings. In contrast to prior studies, we did not detect a gender disparity in incident sepsis. [11] Although alcoholism has been implicated in immune system compromise, moderate alcohol use in this cohort appeared to be protective against sepsis, a finding consistent with studies suggesting similar protective effects against cardiovascular disease. [36,37] Most importantly, in this study whites were at increased

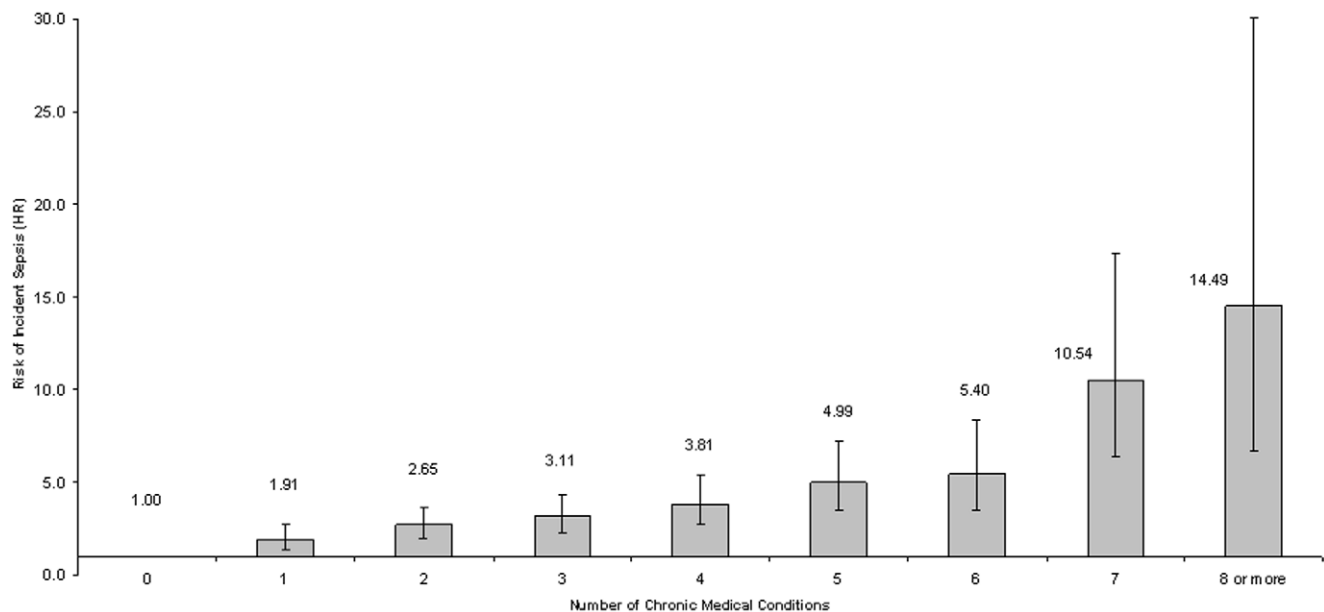

**Figure 1. Adjusted risk of incident sepsis versus number of chronic medical conditions.** Total of 975 incident sepsis events among 30,239 participants in the REGARDS cohort. Chronic medical conditions included hypertension, diabetes, dyslipidemia, coronary artery disease, atrial fibrillation, myocardial infarction, stroke, deep vein thrombosis, peripheral artery disease, chronic kidney disease and chronic lung disease. Hazard ratios adjusted for age, sex, race, education, income, geographic region, smoking status and alcohol use. P-value for test of trend <0.001. doi:10.1371/journal.pone.0048307.g001

risk of sepsis compared with blacks, a finding that differs from published reports. [11,38,39] One potential explanation is that compared with whites, blacks in the REGARDS cohort may have underreported hospitalizations for serious infection. Also, prior studies of gender and sepsis were limited to hospitalized sepsis patients and did not evaluate the risk of sepsis among community dwelling individuals. We emphasize the preliminary nature of this observation and the need for more in-depth analysis to confirm this association and its possible explanations.

An important strength of our study was the use of a national population-based REGARDS cohort, which enabled us to connect baseline characteristics with the incidence of sepsis in individuals from across the US. Prior studies of sepsis epidemiology have been limited to single centers, patients admitted to intensive care units, or larger efforts based upon regional or national hospital discharge data. [2,4,40] Analyses based upon discharge data are limited by the accuracy of assigned diagnoses and have only limited ability to identify baseline patient characteristics or risk factors. In contrast, our study prospectively identified sepsis through the review of Emergency Department or hospital admission records, allowing for more certain identification of sepsis as a reason for (vs. sequelae of) hospitalization. While population-based sepsis studies have occurred in Denmark and other countries, in a prior study we identified two-fold regional variations in US sepsis mortality, underscoring the need for observations specific to the US. [5,41].

### Limitations

Due to time lags in event reports and record retrieval, we could not review medical records for 1,157 individuals with reported serious infection hospitalizations, a figure expected to yield an additional 300 sepsis events. In the primary analysis we treated these observations as censored non-sepsis events. When repeating the analysis without these individuals, we identified largely similar results. Furthermore, compared with individuals included in the analysis, excluded subjects were older and exhibited a greater number of chronic medical conditions. Therefore, if we were to include these participants, we would likely observe even stronger associations with sepsis. The similar gender and race distribution between included and excluded cases provides assurance that medical record retrieval differences were not due to reporting or detection bias.

We did not examine severity variants of sepsis such as severe sepsis and septic shock because these conditions often develop later in the hospital course. Our study is relevant to the care of more advanced stages of sepsis because it identifies individuals at the

earliest stages of disease, setting the stage for preventing subsequent severe sepsis and septic shock. We also did not study repeat sepsis events.

Participants reported hospitalizations for infection, potentially leading to under-identification of sepsis events due to recall or reporting biases. Our approach utilized prospective, systematic, dual review of hospital records using consensus definitions. While we were able to retrieve a large number of hospital records, the inability to retrieve select medical records may have biased the estimates.

Factors outside the scope of this analysis may potentially be associated with sepsis incidence; for example, biomarkers or genetic polymorphisms. Community level factors such as quality of care or antimicrobial resistance may also potentially influence sepsis risk. By design, the REGARDS cohort contains only African Americans and whites, and thus we could not examine associations with other racial groups or Hispanic ethnicity. While we examined income and education, other sociodemographic factors such as marital status may have altered sepsis risk. History of cancer was not ascertained by REGARDS. Our study indicates the presence of chronic medical conditions but not their quality of control. We could not detect potentially relevant comorbidities such as chronic liver disease. Because of the focus of this analysis on chronic medical conditions, we opted to limit examination of these and other confounders.

### Conclusions

Individuals with chronic medical conditions are at increased risk of developing future sepsis events.

### Acknowledgements

The authors thank the other investigators, the staff, and the participants of the REGARDS study for their valuable contributions. A full list of participating REGARDS investigators and institutions can be found at <http://www.regardsstudy.org>.

### Author Contributions

Conceived and designed the experiments: HEW NIS MMS GH. Wrote the paper: HEW. Coordinated data collection: HEW MMS. Performed the analysis: RG. Contributed to the critical review of results: HEW NIS RG MMS SJ GH. Critically reviewed and approved the manuscript: HEW NIS RG MMS SJ GH. Takes responsibility for the paper as a whole: HEW.

### References

- Levy MM, Fink MP, Marshall JC, Abraham E, Angus D, et al. (2003) 2001 SCCM/ESICM/ACCP/ATS/SIS International Sepsis Definitions Conference. *Intensive Care Med* 29: 530–538.
- Angus DC, Linde-Zwirble WT, Lidicker J, Clermont G, Carcillo J, et al. (2001) Epidemiology of severe sepsis in the United States: analysis of incidence, outcome, and associated costs of care. *Crit Care Med* 29: 1303–1310.
- Wang HE, Shapiro NI, Angus DC, Yealy DM (2007) National estimates of severe sepsis in United States emergency departments. *Crit Care Med* 35: 1928–1936.
- Martin GS, Mannino DM, Eaton S, Moss M (2003) The epidemiology of sepsis in the United States from 1979 through 2000. *N Engl J Med* 348: 1546–1554.
- Wang HE, Devereaux RS, Yealy DM, Safford MM, Howard G (2010) National variation in United States sepsis mortality: a descriptive study. *Int J Health Geogr* 9: 9.
- (1999) Ten great public health achievements—United States, 1900–1999. *MMWR Morb Mortal Wkly Rep* 48: 241–243.
- Goldstein LB, Adams R, Becker K, Furberg CD, Gorelick PB, et al. (2001) Primary prevention of ischemic stroke: A statement for healthcare professionals from the Stroke Council of the American Heart Association. *Circulation* 103: 163–182.
- Yusuf S, Hawken S, Ounpuu S, Dans T, Avezum A, et al. (2004) Effect of potentially modifiable risk factors associated with myocardial infarction in 52 countries (the INTERHEART study): case-control study. *Lancet* 364: 937–952.
- Dellinger RP, Carlet JM, Masur H, Gerlach H, Calandra T, et al. (2004) Surviving Sepsis Campaign guidelines for management of severe sepsis and septic shock. *Crit Care Med* 32: 858–873.
- Rivers E, Nguyen B, Havstad S, Ressler J, Muzzin A, et al. (2001) Early goal-directed therapy in the treatment of severe sepsis and septic shock. *N Engl J Med* 345: 1368–1377.
- Esper AM, Moss M, Lewis CA, Nisbet R, Mannino DM, et al. (2006) The role of infection and comorbidity: Factors that influence disparities in sepsis. *Crit Care Med* 34: 2576–2582.
- Howard VJ, Cushman M, Pulley L, Gomez CR, Go RC, et al. (2005) The reasons for geographic and racial differences in stroke study: objectives and design. *Neuroepidemiology* 25: 135–143.
- (2005) National Institute on Alcohol Abuse and Alcoholism. *Helping Patients Who Drink Too Much, a Clinician's Guide*.
- Gotch FA, Kotanko P, Thijssen S, Levin NW (2010) The KDIGO guideline for dialysate calcium will result in an increased incidence of calcium accumulation in hemodialysis patients. *Kidney international* 78: 343–350.

15. Shapiro NI, Wolfe RE, Moore RB, Smith E, Burdick E, et al. (2003) Mortality in Emergency Department Sepsis (MEDS) score: a prospectively derived and validated clinical prediction rule. *Crit Care Med* 31: 670–675.
16. Tran DD, Johan Groeneveld AB, Der Meullen JV, Nauta JJP, Strack Van Scijndel RJM, et al. (1990) Age, chronic disease, sepsis, organ system failure, and mortality in a medical intensive care unit. *Critical Care Medicine* 18: 474–479.
17. Yang Y, Yang KS, Hsann YM, Lim V, Ong BC (2009) The effect of comorbidity and age on hospital mortality and length of stay in patients with sepsis. *J Crit Care*.
18. Murray SB, Bates DW, Ngo L, Ufberg JW, Shapiro NI (2006) Charlson Index is associated with one-year mortality in emergency department patients with suspected infection. *Acad Emerg Med* 13: 530–536.
19. Cave MC, Hurt RT, Frazier TH, Matheson PJ, Garrison RN, et al. (2008) Obesity, inflammation, and the potential application of pharmacconutrition. *Nutr Clin Pract* 23: 16–34.
20. Mathieu P, Poirier P, Pibarot P, Lemieux I, Despres JP (2009) Visceral obesity: the link among inflammation, hypertension, and cardiovascular disease. *Hypertension* 53: 577–584.
21. Tousoulis D (2011) Inflammation in atherosclerosis: current therapeutic approaches. *Curr Pharm Des* 17: 4087–4088.
22. Brooks-Worrell B, Palmer JP (2012) Immunology in the Clinic Review Series; focus on metabolic diseases: development of islet autoimmune disease in type 2 diabetes patients: potential sequelae of chronic inflammation. *Clin Exp Immunol* 167: 40–46.
23. Rosner SA, Ridker PM, Zee RY, Cook NR (2005) Interaction between inflammation-related gene polymorphisms and cigarette smoking on the risk of myocardial infarction in the Physician's Health Study. *Hum Genet* 118: 287–294.
24. Arnson Y, Shoenfeld Y, Amital H (2010) Effects of tobacco smoke on immunity, inflammation and autoimmunity. *J Autoimmun* 34: J258–265.
25. Kellum JA, Kong L, Fink MP, Weissfeld LA, Yealy DM, et al. (2007) Understanding the inflammatory cytokine response in pneumonia and sepsis: results of the Genetic and Inflammatory Markers of Sepsis (GenIMS) Study. *Arch Intern Med* 167: 1655–1663.
26. Aird WC (2007) Endothelium as a therapeutic target in sepsis. *Curr Drug Targets* 8: 501–507.
27. Skyler JS, Bergenstal R, Bonow RO, Buse J, Deedwania P, et al. (2009) Intensive Glycemic Control and the Prevention of Cardiovascular Events: Implications of the ACCORD, ADVANCE, and VA Diabetes Trials. *Circulation* 119: 351–357.
28. Kornum JB, Thomsen RW, Riis A, Lervang HH, Schonheyder HC, et al. (2008) Diabetes, glycemic control, and risk of hospitalization with pneumonia: a population-based case-control study. *Diabetes Care* 31: 1541–1545.
29. Critchley JA, Capewell S (2003) Mortality Risk Reduction Associated With Smoking Cessation in Patients With Coronary Heart Disease. *JAMA* 290: 86–97.
30. Yende S, Angus DC, Ali IS, Somes G, Newman AB, et al. (2007) Influence of comorbid conditions on long-term mortality after pneumonia in older people. *J Am Geriatr Soc* 55: 518–525.
31. Wang HE, Gamboa C, Warnock DG, Muntner P (2011) Chronic kidney disease and risk of death from infection. *Am J Nephrol* 34: 330–336.
32. Bertoni AG, Saydah S, Brancati FL (2001) Diabetes and the risk of infection-related mortality in the U.S. *Diabetes Care* 24: 1044–1049.
33. Salman S, Bajwa A, Gajic O, Afessa B (2008) Paroxysmal atrial fibrillation in critically ill patients with sepsis. *J Intensive Care Med* 23: 178–183.
34. Walkey AJ, Wiener RS, Ghobrial JM, Curtis LH, Benjamin EJ (2011) Incident stroke and mortality associated with new-onset atrial fibrillation in patients hospitalized with severe sepsis. *JAMA* 306: 2248–2254.
35. Memis D, GURSOY O, Tasdogan M, Sut N, Kurt I, et al. (2007) High C-reactive protein and low cholesterol levels are prognostic markers of survival in severe sepsis. *J Clin Anesth* 19: 186–191.
36. O'Brien JM, Jr., Lu B, Ali NA, Martin GS, Abernethy SK, et al. (2007) Alcohol dependence is independently associated with sepsis, septic shock, and hospital mortality among adult intensive care unit patients. *Crit Care Med* 35: 345–350.
37. Rimm EB, Klatsky A, Grobbee D, Stampfer MJ (1996) Review of moderate alcohol consumption and reduced risk of coronary heart disease: is the effect due to beer, wine, or spirits. *BMJ* 312: 731–736.
38. Dombrovskiy VY, Martin AA, Sunderram J, Paz HL (2007) Occurrence and outcomes of sepsis: influence of race. *Crit Care Med* 35: 763–768.
39. Mayr FB, Yende S, Linde-Zwirble WT, Peck-Palmer OM, Barnato AE, et al. (2010) Infection rate and acute organ dysfunction risk as explanations for racial differences in severe sepsis. *JAMA* 303: 2495–2503.
40. Sands KE, Bates DW, Lanken PN, Graman PS, Hibberd PL, et al. (1997) Epidemiology of sepsis syndrome in 8 academic medical centers. *JAMA* 278: 234–240.
41. Thomsen RW, Hundborg HH, Johnsen SP, Pedersen L, Sorensen HT, et al. (2006) Statin use and mortality within 180 days after bacteremia: a population-based cohort study. *Crit Care Med* 34: 1080–1086.
